# Supplementary material
Source: Springer Nature journal article supplement (https://www.springermedizin.de/resource/supplementary/12916_2006_89_MOESM8_ESM.pdf/9599144)

### Treatment with antivirals

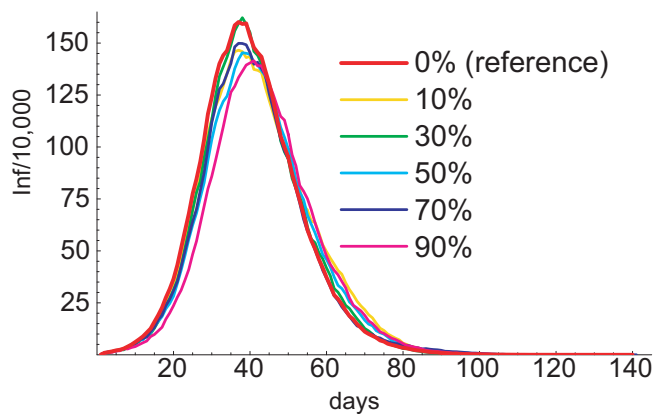

### Household contacts prophylaxis

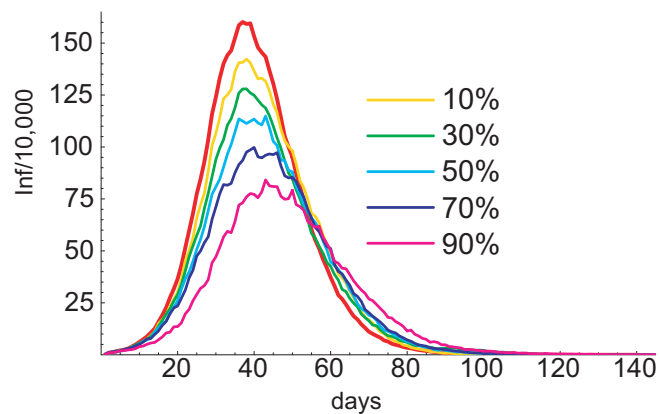

### Treatment with antivirals + Household contacts prophylaxis

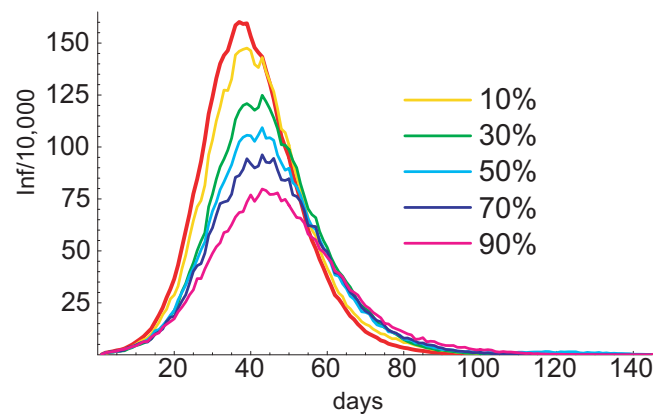

### Reactive vaccination (70% coverage)

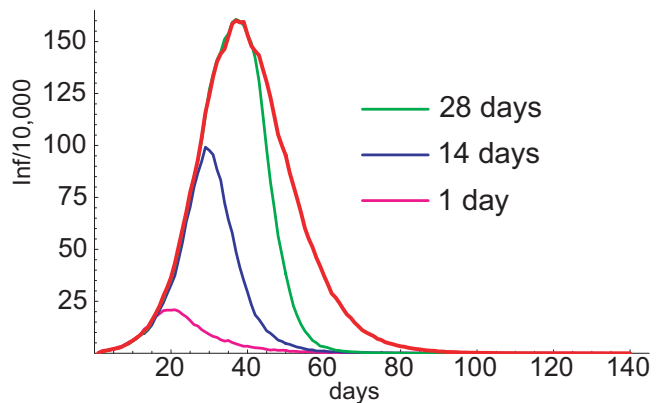

### Closure of schools or workplaces (when > 5/1000 infected individuals)

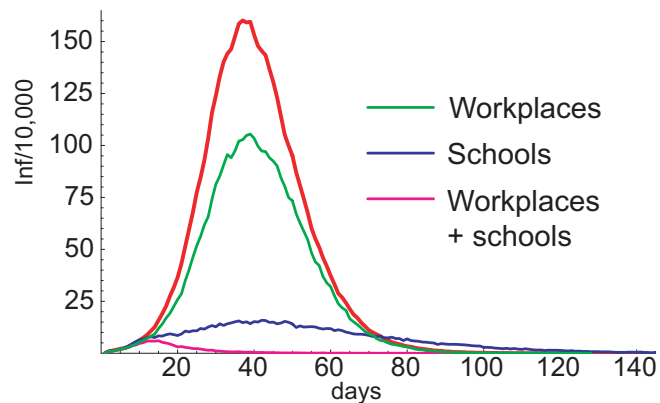

### Treatment with antivirals + Household contacts prophylaxis + Confinement of household members

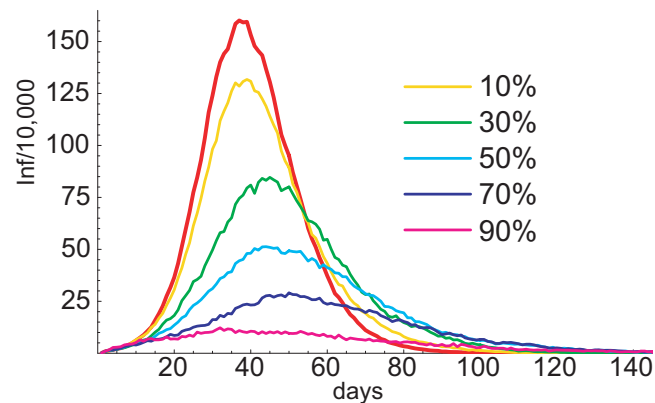

Supplement: MOESM8 [file 9599144]
